# Supplementary material for: Identification of Breast Cancer Metastasis Markers Using Machine Learning Approaches with Gene Expression Profiles
Source: Preprints.org preprint supplement (doi:10.20944/preprints202309.0227.v1), 2023-09-05
Supplement: Supplementary file 1 [file supplement_Figure_S1~S2.docx]

- **Title**

**Identification of breast cancer metastasis markers using machine learning approaches with gene expression profiles**

- **Authors**

Jinmyung Jung1, * Sunyong Yoo2,*

1Division of Data Science, College of Information and Communication Technology, The University of Suwon, Hwaseong 18323, Republic of Korea

2Department of ICT Convergence System Engineering, Chonnam National University, Gwangju 61005, Republic of Korea


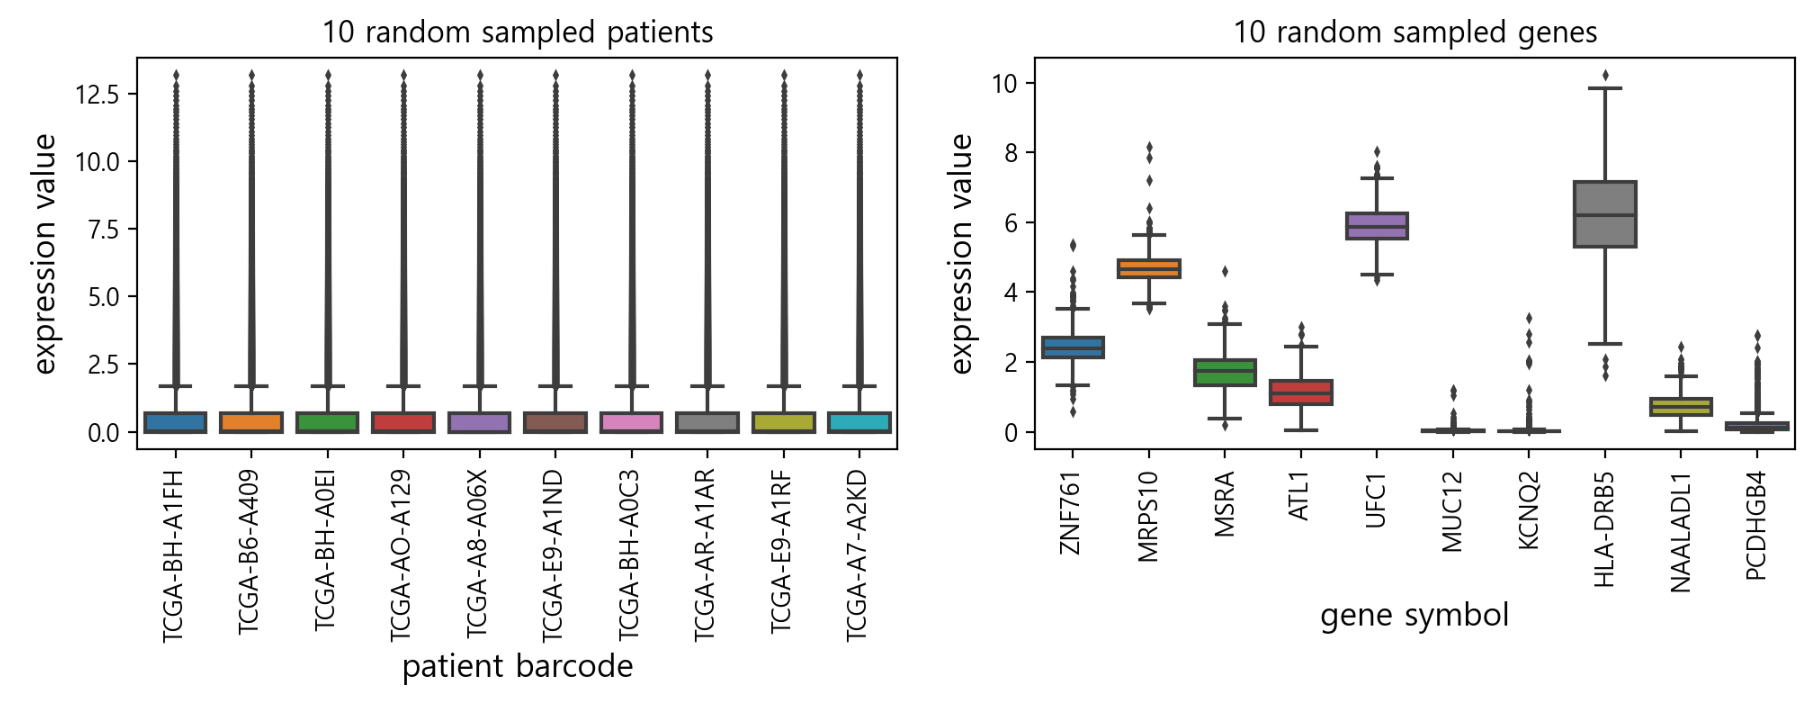


**Figure S1. Boxplots of the preprocessed gene expressions for randomly selected participants (left) and genes (right)**


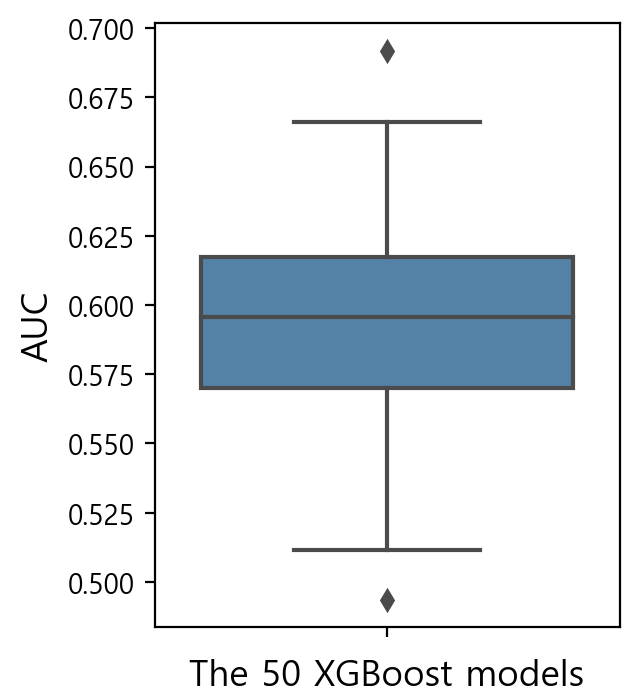


**Figure S2. The box plots of the 50 AUCs obtained from the 50 trained XGBoost models.**
